# Supplementary material for: PbLnB7O13(Ln = Tb or Eu): a new type of layered polyborate with multi-colour light emission properties
Source: Royal Society of Chemistry journal article supplement (doi:10.1039/c7dt01558e), 2017-01-01
Supplement: c7dt01558e2.pdf [file c7dt01558e2.pdf]

Table S1. Fractional atomic coordinates and isotropic or equivalent isotropic displacement parameters ( $\text{\AA}^2$ ) of  $\text{PbLnB}_7\text{O}_{13}$  (Ln=Tb, Eu).

| $\text{PbTbB}_7\text{O}_{13}$ | $x$          | $y$          | $z$          | $U_{\text{iso}}^*/U_{\text{eq}}$ |
|-------------------------------|--------------|--------------|--------------|----------------------------------|
| Pb1                           | 0.16273 (17) | 0.58706 (11) | 0.36068 (8)  | 0.0113 (3)                       |
| Pb2                           | 0.33540 (16) | 0.69375 (10) | 0.63876 (8)  | 0.0104 (3)                       |
| Tb1                           | -0.4990 (3)  | 0.76578 (14) | 0.99917 (11) | 0.0042 (4)                       |
| Tb2                           | 0.0010 (2)   | 0.51822 (14) | 1.00734 (11) | 0.0044 (4)                       |
| O1                            | 0.755 (3)    | 0.530 (2)    | 0.2741 (14)  | 0.003 (4)                        |
| O2                            | 0.674 (3)    | 0.534 (2)    | 0.4251 (14)  | 0.008 (3)                        |
| O3                            | 0.447 (3)    | 0.524 (3)    | 0.2663 (16)  | 0.008 (3)                        |
| O4                            | 0.417 (2)    | 0.578 (2)    | 0.4967 (14)  | 0.005 (2)                        |
| O5                            | 0.242 (2)    | 0.9203 (19)  | 0.1088 (13)  | 0.007 (3)                        |
| O6                            | 0.339 (2)    | 0.6667 (18)  | 0.1123 (13)  | 0.004 (3)                        |
| O7                            | 0.278 (3)    | 0.786 (3)    | 0.2637 (15)  | 0.004 (4)                        |
| O8                            | 0.333 (2)    | 0.934 (2)    | 0.4175 (14)  | 0.009 (4)                        |
| O9                            | 0.425 (3)    | 1.009 (3)    | 0.2632 (16)  | 0.008 (4)                        |
| O10                           | 0.050 (2)    | 0.7191 (17)  | 0.1200 (12)  | 0.006 (3)                        |
| O11                           | -0.252 (2)   | 0.6709 (18)  | 0.1129 (13)  | 0.005 (3)                        |
| O12                           | -0.067 (3)   | 0.778 (3)    | 0.2707 (16)  | 0.005 (4)                        |
| O13                           | -0.138 (2)   | 0.875 (2)    | 0.4199 (14)  | 0.007 (4)                        |
| O14                           | 0.074 (2)    | 0.686 (2)    | 0.5003 (14)  | 0.008 (3)                        |
| O15                           | -0.163 (3)   | 0.780 (2)    | 0.5731 (15)  | 0.008 (3)                        |
| O16                           | -0.256 (3)   | 0.769 (2)    | 0.7341 (16)  | 0.008 (3)                        |
| O17                           | 0.052 (3)    | 0.757 (3)    | 0.7290 (16)  | 0.010 (4)                        |
| O18                           | -0.041 (2)   | 0.7204 (16)  | 0.8929 (11)  | 0.004 (3)                        |
| O19                           | -0.347 (2)   | 0.6714 (19)  | 0.8825 (13)  | 0.006 (3)                        |
| O20                           | 0.153 (2)    | 0.919 (2)    | 0.8792 (13)  | 0.007 (3)                        |
| O21                           | 0.461 (2)    | 0.9688 (16)  | 0.8915 (11)  | 0.003 (3)                        |
| O22                           | 0.258 (2)    | 0.6689 (19)  | 0.8784 (13)  | 0.005 (2)                        |
| O23                           | 0.225 (3)    | 0.505 (3)    | 0.7284 (16)  | 0.009 (5)                        |
| O24                           | 0.158 (2)    | 0.4189 (18)  | 0.8939 (12)  | 0.003 (3)                        |
| O25                           | 0.457 (2)    | 0.4694 (17)  | 0.8875 (12)  | 0.005 (3)                        |
| O26                           | 0.244 (2)    | 0.4213 (19)  | 1.1203 (13)  | 0.005 (3)                        |
| B1                            | 0.629 (4)    | 0.533 (3)    | 0.318 (2)    | 0.003 (4)                        |
| B2                            | 0.585 (4)    | 0.523 (3)    | 0.498 (2)    | 0.003 (4)                        |
| B3                            | 0.362 (4)    | 0.915 (4)    | 0.316 (2)    | 0.004 (2)                        |
| B4                            | -0.148 (4)   | 0.886 (4)    | 0.3195 (15)  | 0.004 (2)                        |
| B5                            | -0.062 (4)   | 0.776 (3)    | 0.494 (2)    | 0.005 (3)                        |
| B6                            | -0.111 (4)   | 0.764 (3)    | 0.681 (2)    | 0.004 (2)                        |
| B7                            | 0.232 (5)    | 0.776 (4)    | 0.151 (3)    | 0.008 (3)                        |
| B8                            | -0.230 (5)   | 0.773 (4)    | 0.836 (3)    | 0.007 (4)                        |
| B9                            | 0.102 (5)    | 0.764 (4)    | 0.839 (3)    | 0.005 (3)                        |

|                                    |              |              |              |                                                               |
|------------------------------------|--------------|--------------|--------------|---------------------------------------------------------------|
| B10                                | 0.283 (4)    | 1.025 (4)    | 0.848 (3)    | 0.007 (6)                                                     |
| B11                                | 0.391 (4)    | 0.517 (4)    | 1.155 (3)    | 0.005 (3)                                                     |
| B12                                | 0.279 (5)    | 0.516 (4)    | 0.850 (3)    | 0.008 (4)                                                     |
| B13                                | 0.614 (5)    | 0.516 (4)    | 0.849 (3)    | 0.004 (2)                                                     |
| B14                                | -0.103 (5)   | 0.772 (4)    | 0.158 (3)    | 0.004 (6)                                                     |
|                                    |              |              |              |                                                               |
| PbEuB <sub>7</sub> O <sub>13</sub> | <i>x</i>     | <i>y</i>     | <i>z</i>     | <i>U</i> <sub>iso</sub> <sup>*</sup> / <i>U</i> <sub>eq</sub> |
| Pb1                                | 0.33486 (14) | 0.81823 (8)  | 0.63852 (6)  | 0.0101 (3)                                                    |
| Pb2                                | 0.16309 (14) | 0.92372 (8)  | 0.36117 (6)  | 0.0096 (3)                                                    |
| Eu1                                | 0.4989 (2)   | 0.25105 (12) | 0.00072 (8)  | 0.0032 (4)                                                    |
| Eu2                                | -0.0009 (2)  | 0.49863 (12) | -0.00767 (9) | 0.0028 (3)                                                    |
| B1                                 | 0.118 (4)    | 0.265 (3)    | 0.3226 (19)  | 0.002 (4)                                                     |
| B2                                 | -0.374 (4)   | -0.007 (3)   | 0.3174 (18)  | 0.002 (3)                                                     |
| B3                                 | 0.358 (4)    | 0.611 (4)    | 0.316 (2)    | 0.005 (3)                                                     |
| B4                                 | 0.569 (3)    | 0.995 (3)    | 0.4998 (19)  | 0.005 (3)                                                     |
| B5                                 | 0.073 (3)    | 1.239 (3)    | 0.502 (2)    | 0.005 (3)                                                     |
| B6                                 | 0.147 (5)    | 1.140 (4)    | 0.679 (3)    | 0.016 (6)                                                     |
| B7                                 | 0.396 (4)    | 0.000 (4)    | 0.162 (2)    | 0.005 (3)                                                     |
| B8                                 | 0.230 (4)    | 0.258 (3)    | 0.156 (2)    | 0.002 (3)                                                     |
| B9                                 | -0.108 (4)   | 0.253 (3)    | 0.156 (2)    | 0.003 (4)                                                     |
| B10                                | -0.281 (4)   | 0.004 (3)    | 0.159 (2)    | 0.005 (3)                                                     |
| B11                                | 0.398 (4)    | 0.502 (3)    | 0.160 (2)    | 0.005 (3)                                                     |
| B12                                | 0.231 (4)    | 0.744 (3)    | 0.151 (2)    | 0.002 (3)                                                     |
| B13                                | 0.276 (4)    | 1.000 (3)    | 0.843 (2)    | 0.002 (3)                                                     |
| B14                                | 0.107 (4)    | 1.251 (3)    | 0.850 (2)    | 0.002 (3)                                                     |
| O1                                 | -0.330 (3)   | 0.003 (2)    | 0.4255 (14)  | 0.017 (4)                                                     |
| O2                                 | -0.246 (3)   | 0.001 (2)    | 0.2702 (13)  | 0.005 (4)                                                     |
| O3                                 | -0.2495 (17) | -0.1451 (14) | 0.1127 (10)  | 0.004 (2)                                                     |
| O4                                 | -0.1567 (16) | 0.1046 (14)  | 0.1223 (9)   | 0.005 (2)                                                     |
| O5                                 | -0.044 (2)   | 0.2652 (18)  | 0.2731 (13)  | 0.005 (4)                                                     |
| O6                                 | 0.164 (3)    | 0.2579 (19)  | 0.4247 (13)  | 0.008 (4)                                                     |
| O7                                 | 0.252 (3)    | 0.263 (2)    | 0.2696 (13)  | 0.006 (4)                                                     |
| O8                                 | 0.0412 (17)  | 0.2980 (13)  | 0.1079 (9)   | 0.005 (2)                                                     |
| O9                                 | 0.441 (2)    | -0.0023 (18) | 0.2668 (12)  | 0.003 (4)                                                     |
| O10                                | 0.3411 (17)  | -0.1457 (14) | 0.1161 (10)  | 0.008 (3)                                                     |
| O11                                | 0.5407 (15)  | 0.0477 (13)  | 0.1115 (9)   | 0.003 (2)                                                     |
| O12                                | 0.2451 (16)  | 0.1026 (14)  | 0.1206 (9)   | 0.003 (2)                                                     |
| O13                                | 0.3475 (16)  | 0.3522 (13)  | 0.1207 (9)   | 0.003 (2)                                                     |
| O14                                | 0.423 (2)    | 0.511 (2)    | 0.2638 (13)  | 0.006 (4)                                                     |
| O15                                | 0.2451 (16)  | 0.6023 (13)  | 0.1084 (9)   | 0.004 (2)                                                     |
| O16                                | 0.0486 (17)  | 0.8018 (13)  | 0.1229 (9)   | 0.004 (2)                                                     |
| O17                                | 0.281 (2)    | 0.735 (2)    | 0.2690 (13)  | 0.003 (4)                                                     |
| O18                                | 0.337 (2)    | 0.593 (2)    | 0.4163 (13)  | 0.011 (4)                                                     |

|     |             |             |             |           |
|-----|-------------|-------------|-------------|-----------|
| O19 | 0.075 (2)   | 0.815 (3)   | 0.4997 (13) | 0.014 (4) |
| O20 | 0.418 (2)   | 0.924 (3)   | 0.4985 (12) | 0.010 (4) |
| O21 | 0.138 (2)   | 1.148 (2)   | 0.5780 (13) | 0.010 (4) |
| O22 | 0.227 (3)   | 1.017 (2)   | 0.7312 (14) | 0.010 (4) |
| O23 | 0.1596 (16) | 1.1040 (14) | 0.8914 (10) | 0.006 (2) |
| O24 | 0.063 (2)   | 1.243 (2)   | 0.7299 (13) | 0.003 (4) |
| O25 | 0.4561 (16) | 1.0477 (13) | 0.8873 (9)  | 0.006 (2) |
| O26 | 0.2568 (17) | 0.8508 (14) | 0.8791 (10) | 0.005 (2) |

Table S2. Selected Interatomic Distances (Å) and Angles (deg) for PbLnB<sub>7</sub>O<sub>13</sub> (Ln=Tb, Eu).

| PbTbB <sub>7</sub> O <sub>13</sub> |            |                         |          |
|------------------------------------|------------|-------------------------|----------|
| Pb1—O14                            | 2.298 (18) | B5—O15                  | 1.45 (4) |
| Pb1—O4                             | 2.354 (17) | B6—O15                  | 1.40 (4) |
| Pb1—O7                             | 2.50 (2)   | B6—O16                  | 1.46 (4) |
| Pb1—O12                            | 2.58 (2)   | B6—O17                  | 1.28 (4) |
| Pb1—O3                             | 2.85 (2)   | B7—O6                   | 1.46 (4) |
| Pb2—O4                             | 2.366 (18) | B7—O5                   | 1.44 (4) |
| Pb2—O14                            | 2.36 (3)   | B7—O7                   | 1.45 (4) |
| Pb2—O23                            | 2.407 (18) | B7—O10                  | 1.48 (4) |
| Pb2—O9 <sup>i</sup>                | 2.62 (2)   | B8—O16                  | 1.32 (4) |
| Pb2—O17                            | 2.78 (2)   | B8—O18                  | 1.57 (4) |
| Tb1—O19                            | 2.309 (15) | B8—O19                  | 1.52 (4) |
| Tb1—O21 <sup>ii</sup>              | 2.312 (17) | B8—O26 <sup>v</sup>     | 1.48 (4) |
| Tb1—O6 <sup>iii</sup>              | 2.321 (17) | B9—O17                  | 1.42 (4) |
| Tb1—O11 <sup>iv</sup>              | 2.343 (17) | B9—O18                  | 1.50 (4) |
| Tb1—O25 <sup>v</sup>               | 2.352 (16) | B9—O20                  | 1.52 (4) |
| Tb1—O22 <sup>ii</sup>              | 2.357 (15) | B9—O22                  | 1.48 (4) |
| Tb2—O26                            | 2.302 (16) | B10—O20                 | 1.52 (4) |
| Tb2—O20 <sup>vi</sup>              | 2.309 (17) | B10—O21                 | 1.47 (4) |
| Tb2—O5 <sup>vii</sup>              | 2.321 (16) | B10—O1 <sup>ix</sup>    | 1.58 (4) |
| Tb2—O24                            | 2.326 (17) | B10—O11 <sup>x</sup>    | 1.47 (4) |
| Tb2—O10 <sup>iv</sup>              | 2.333 (16) | B11—O26                 | 1.42 (4) |
| Tb2—O18                            | 2.356 (15) | B11—O21 <sup>xiv</sup>  | 1.48 (3) |
| B1—O1                              | 1.25 (4)   | B11—O6 <sup>iv</sup>    | 1.50 (4) |
| B1—O2                              | 1.38 (3)   | B11—O3 <sup>iv</sup>    | 1.44 (4) |
| B1—O3                              | 1.42 (4)   | B12—O22                 | 1.46 (4) |
| B2—O2                              | 1.32 (3)   | B12—O23                 | 1.57 (4) |
| B2—O4                              | 1.39 (3)   | B12—O24                 | 1.51 (4) |
| B2—O8 <sup>i</sup>                 | 1.41 (4)   | B12—O25                 | 1.42 (4) |
| B3—O7                              | 1.44 (4)   | B13—O19 <sup>xiii</sup> | 1.49 (4) |
| B3—O8                              | 1.42 (3)   | B13—O5 <sup>i</sup>     | 1.42 (4) |
| B3—O9                              | 1.27 (4)   | B13—O9 <sup>i</sup>     | 1.44 (4) |

|                                                                                                                                                                                                                                                                                                                                                            |            |                                           |          |
|------------------------------------------------------------------------------------------------------------------------------------------------------------------------------------------------------------------------------------------------------------------------------------------------------------------------------------------------------------|------------|-------------------------------------------|----------|
| B4—O12                                                                                                                                                                                                                                                                                                                                                     | 1.40 (4)   | B13—O25                                   | 1.49 (4) |
| B4—O13                                                                                                                                                                                                                                                                                                                                                     | 1.319 (7)  | B14—O10                                   | 1.47 (4) |
| B4—O23 <sup>x</sup>                                                                                                                                                                                                                                                                                                                                        | 1.32 (4)   | B14—O12                                   | 1.46 (4) |
| B5—O13                                                                                                                                                                                                                                                                                                                                                     | 1.36 (4)   | B14—O11                                   | 1.49 (4) |
| B5—O14                                                                                                                                                                                                                                                                                                                                                     | 1.33 (3)   | B14—O24 <sup>x</sup>                      | 1.52 (4) |
|                                                                                                                                                                                                                                                                                                                                                            |            |                                           |          |
| O1—B1—O2                                                                                                                                                                                                                                                                                                                                                   | 116 (3)    | O17—B9—O20                                | 113 (3)  |
| O1—B1—O3                                                                                                                                                                                                                                                                                                                                                   | 125 (3)    | O22—B9—O20                                | 107 (2)  |
| O2—B1—O3                                                                                                                                                                                                                                                                                                                                                   | 119 (3)    | O18—B9—O20                                | 104 (2)  |
| O2—B2—O4                                                                                                                                                                                                                                                                                                                                                   | 127 (3)    | O21—B10—O11 <sup>x</sup>                  | 113 (2)  |
| O2—B2—O8 <sup>i</sup>                                                                                                                                                                                                                                                                                                                                      | 114 (2)    | O21—B10—O20                               | 107 (2)  |
| O4—B2—O8 <sup>i</sup>                                                                                                                                                                                                                                                                                                                                      | 118 (2)    | O11 <sup>x</sup> —B10—O20                 | 107 (2)  |
| O9—B3—O8                                                                                                                                                                                                                                                                                                                                                   | 127 (3)    | O21—B10—O1 <sup>ix</sup>                  | 111 (2)  |
| O9—B3—O7                                                                                                                                                                                                                                                                                                                                                   | 118 (2)    | O11 <sup>x</sup> —B10—O1 <sup>ix</sup>    | 109 (2)  |
| O8—B3—O7                                                                                                                                                                                                                                                                                                                                                   | 114 (2)    | O20—B10—O1 <sup>ix</sup>                  | 109 (2)  |
| O13—B4—O23 <sup>x</sup>                                                                                                                                                                                                                                                                                                                                    | 118 (3)    | O26—B11—O3 <sup>iii</sup>                 | 113 (3)  |
| O13—B4—O12                                                                                                                                                                                                                                                                                                                                                 | 119 (2)    | O26—B11—O21 <sup>xiv</sup>                | 109 (2)  |
| O23 <sup>x</sup> —B4—O12                                                                                                                                                                                                                                                                                                                                   | 123.3 (18) | O3 <sup>iii</sup> —B11—O21 <sup>xiv</sup> | 111 (3)  |
| O14—B5—O13                                                                                                                                                                                                                                                                                                                                                 | 132 (3)    | O26—B11—O6 <sup>iii</sup>                 | 108 (2)  |
| O14—B5—O15                                                                                                                                                                                                                                                                                                                                                 | 121 (2)    | O3 <sup>iii</sup> —B11—O6 <sup>iii</sup>  | 110 (3)  |
| O13—B5—O15                                                                                                                                                                                                                                                                                                                                                 | 107 (2)    | O21 <sup>xiv</sup> —B11—O6 <sup>iii</sup> | 106 (2)  |
| O17—B6—O15                                                                                                                                                                                                                                                                                                                                                 | 122 (3)    | O25—B12—O22                               | 111 (3)  |
| O17—B6—O16                                                                                                                                                                                                                                                                                                                                                 | 123 (3)    | O25—B12—O24                               | 109 (3)  |
| O15—B6—O16                                                                                                                                                                                                                                                                                                                                                 | 115 (3)    | O22—B12—O24                               | 110 (2)  |
| O5—B7—O6                                                                                                                                                                                                                                                                                                                                                   | 113 (3)    | O25—B12—O23                               | 111 (3)  |
| O5—B7—O10                                                                                                                                                                                                                                                                                                                                                  | 110 (3)    | O22—B12—O23                               | 108 (3)  |
| O6—B7—O10                                                                                                                                                                                                                                                                                                                                                  | 105 (3)    | O24—B12—O23                               | 108 (3)  |
| O5—B7—O7                                                                                                                                                                                                                                                                                                                                                   | 108 (3)    | O5 <sup>i</sup> —B13—O9 <sup>i</sup>      | 110 (3)  |
| O6—B7—O7                                                                                                                                                                                                                                                                                                                                                   | 112 (3)    | O5 <sup>i</sup> —B13—O25                  | 109 (2)  |
| O10—B7—O7                                                                                                                                                                                                                                                                                                                                                  | 108 (3)    | O9 <sup>i</sup> —B13—O25                  | 110 (3)  |
| O16—B8—O26 <sup>v</sup>                                                                                                                                                                                                                                                                                                                                    | 114 (3)    | O5 <sup>i</sup> —B13—O19 <sup>xiii</sup>  | 112 (3)  |
| O16—B8—O19                                                                                                                                                                                                                                                                                                                                                 | 116 (3)    | O9 <sup>i</sup> —B13—O19 <sup>xiii</sup>  | 109 (3)  |
| O26 <sup>v</sup> —B8—O19                                                                                                                                                                                                                                                                                                                                   | 107 (2)    | O25—B13—O19 <sup>xiii</sup>               | 107 (2)  |
| O16—B8—O18                                                                                                                                                                                                                                                                                                                                                 | 113 (3)    | O12—B14—O10                               | 112 (3)  |
| O26 <sup>v</sup> —B8—O18                                                                                                                                                                                                                                                                                                                                   | 103 (2)    | O12—B14—O11                               | 113 (2)  |
| O19—B8—O18                                                                                                                                                                                                                                                                                                                                                 | 102 (2)    | O10—B14—O11                               | 106 (2)  |
| O17—B9—O22                                                                                                                                                                                                                                                                                                                                                 | 110 (3)    | O12—B14—O24 <sup>x</sup>                  | 113 (3)  |
| O17—B9—O18                                                                                                                                                                                                                                                                                                                                                 | 114 (3)    | O10—B14—O24 <sup>x</sup>                  | 107 (2)  |
| O22—B9—O18                                                                                                                                                                                                                                                                                                                                                 | 108 (2)    | O11—B14—O24 <sup>x</sup>                  | 105 (2)  |
| Symmetry codes: (i) $-x+1, y-1/2, -z+1$ ; (ii) $x-1, y, z$ ; (iii) $x, y, z+1$ ; (iv) $x-1, y, z+1$ ; (v) $-x, y+1/2, -z+2$ ; (vi) $-x, y-1/2, -z+2$ ; (vii) $-x, y-1/2, -z+1$ ; (viii) $x, y, z-1$ ; (ix) $-x+1, y+1/2, -z+1$ ; (x) $-x, y+1/2, -z+1$ ; (xi) $x+1, y, z-1$ ; (xii) $-x+1, y+1/2, -z+2$ ; (xiii) $x+1, y, z$ ; (xiv) $-x+1, y-1/2, -z+2$ . |            |                                           |          |

| PbEuB <sub>7</sub> O <sub>13</sub> |            |                          |          |
|------------------------------------|------------|--------------------------|----------|
| Pb1—O20                            | 2.316 (17) | B6—O22                   | 1.39 (4) |
| Pb1—O19                            | 2.410 (18) | B6—O24                   | 1.40 (4) |
| Pb1—O22                            | 2.45 (2)   | B7—O9                    | 1.36 (3) |
| Pb1—O14i                           | 2.69 (2)   | B7—O10                   | 1.49 (3) |
| Pb1—O5ii                           | 2.82 (2)   | B7—O11                   | 1.50 (3) |
| Pb2—O19                            | 2.327 (19) | B7—O12                   | 1.51 (3) |
| Pb2—O20                            | 2.377 (16) | B7—Eu2ix                 | 3.30 (3) |
| Pb2—O17                            | 2.416 (18) | B8—O13                   | 1.41 (3) |
| Pb2—O24ii                          | 2.512 (18) | B8—O7                    | 1.48 (3) |
| Pb2—O9xiii                         | 2.511 (18) | B8—O12                   | 1.51 (3) |
| Eu1—O11                            | 2.344 (11) | B8—O8                    | 1.51 (3) |
| Eu1—O25iii                         | 2.365 (12) | B9—O4                    | 1.44 (3) |
| Eu1—O3iv                           | 2.372 (13) | B9—O26ii                 | 1.46 (3) |
| Eu1—O26v                           | 2.372 (13) | B9—O8                    | 1.50 (3) |
| Eu1—O13                            | 2.375 (12) | B9—O5                    | 1.53 (3) |
| Eu1—O10vi                          | 2.394 (13) | B10—O2                   | 1.44 (3) |
| Eu2—O16ix                          | 2.334 (12) | B10—O11x                 | 1.45 (3) |
| Eu2—O12iv                          | 2.342 (12) | B10—O4                   | 1.49 (3) |
| Eu2—O8                             | 2.363 (12) | B10—O3                   | 1.53 (3) |
| Eu2—O4iv                           | 2.369 (12) | B10—Eu1x                 | 3.29 (3) |
| Eu2—O15                            | 2.369 (12) | B10—Eu2ix                | 3.30 (3) |
| Eu2—O23ii                          | 2.389 (13) | B11—O14                  | 1.36 (3) |
| B1—O5                              | 1.28 (3)   | B11—O25v                 | 1.48 (3) |
| B1—O6                              | 1.32 (3)   | B11—O13                  | 1.48 (3) |
| B1—O7                              | 1.39 (3)   | B11—O15                  | 1.53 (3) |
| B2—O2                              | 1.30 (3)   | B12—O15                  | 1.43 (3) |
| B2—O1                              | 1.40 (3)   | B12—O10xiii              | 1.46 (3) |
| B2—O9x                             | 1.45 (3)   | B12—O16                  | 1.48 (3) |
| B3—O14                             | 1.31 (3)   | B12—O17                  | 1.53 (3) |
| B3—O17                             | 1.35 (4)   | B13—O22                  | 1.45 (3) |
| B3—O18                             | 1.39 (3)   | B13—O26                  | 1.46 (3) |
| B4—O20                             | 1.34 (3)   | B13—O25                  | 1.46 (3) |
| B4—O1xi                            | 1.40 (3)   | B13—O23                  | 1.55 (3) |
| B4—O18i                            | 1.48 (3)   | B14—O16xii               | 1.42 (3) |
| B5—O21                             | 1.32 (3)   | B14—O3xiv                | 1.46 (3) |
| B5—O19xii                          | 1.34 (3)   | B14—O23                  | 1.47 (3) |
| B5—O6xiii                          | 1.39 (3)   | B14—O24                  | 1.56 (3) |
| B6—O21                             | 1.33 (4)   |                          |          |
|                                    |            |                          |          |
| O5—B1—O6                           | 122 (3)    | O4—B9—O5                 | 113 (2)  |
| O5—B1—O7                           | 120 (2)    | O26 <sup>ii</sup> —B9—O5 | 109 (2)  |
| O6—B1—O7                           | 117 (2)    | O8—B9—O5                 | 108 (2)  |

|                                                                                                                                                                                                                                                                                                                                                                                                                                                      |            |                                           |            |
|------------------------------------------------------------------------------------------------------------------------------------------------------------------------------------------------------------------------------------------------------------------------------------------------------------------------------------------------------------------------------------------------------------------------------------------------------|------------|-------------------------------------------|------------|
| O2—B2—O1                                                                                                                                                                                                                                                                                                                                                                                                                                             | 117 (2)    | O2—B10—O11 <sup>x</sup>                   | 113 (2)    |
| O2—B2—O9 <sup>x</sup>                                                                                                                                                                                                                                                                                                                                                                                                                                | 125 (2)    | O2—B10—O4                                 | 111 (2)    |
| O1—B2—O9 <sup>x</sup>                                                                                                                                                                                                                                                                                                                                                                                                                                | 117 (2)    | O11 <sup>x</sup> —B10—O4                  | 108.6 (19) |
| O14—B3—O17                                                                                                                                                                                                                                                                                                                                                                                                                                           | 121 (3)    | O2—B10—O3                                 | 112 (2)    |
| O14—B3—O18                                                                                                                                                                                                                                                                                                                                                                                                                                           | 124 (3)    | O11 <sup>x</sup> —B10—O3                  | 107.2 (19) |
| O17—B3—O18                                                                                                                                                                                                                                                                                                                                                                                                                                           | 114 (2)    | O4—B10—O3                                 | 104.0 (17) |
| O20—B4—O1 <sup>xi</sup>                                                                                                                                                                                                                                                                                                                                                                                                                              | 131 (2)    | O14—B11—O25 <sup>v</sup>                  | 118 (2)    |
| O20—B4—O18 <sup>i</sup>                                                                                                                                                                                                                                                                                                                                                                                                                              | 126 (2)    | O14—B11—O13                               | 112 (2)    |
| O1 <sup>xi</sup> —B4—O18 <sup>i</sup>                                                                                                                                                                                                                                                                                                                                                                                                                | 104 (2)    | O25 <sup>v</sup> —B11—O13                 | 106.3 (19) |
| O21—B5—O19 <sup>xii</sup>                                                                                                                                                                                                                                                                                                                                                                                                                            | 121 (2)    | O14—B11—O15                               | 109 (2)    |
| O21—B5—O6 <sup>xiii</sup>                                                                                                                                                                                                                                                                                                                                                                                                                            | 118 (2)    | O25 <sup>v</sup> —B11—O15                 | 103.9 (18) |
| O19 <sup>xii</sup> —B5—O6 <sup>xiii</sup>                                                                                                                                                                                                                                                                                                                                                                                                            | 121 (2)    | O13—B11—O15                               | 106.1 (19) |
| O21—B6—O22                                                                                                                                                                                                                                                                                                                                                                                                                                           | 117 (3)    | O15—B12—O10 <sup>xiii</sup>               | 113.1 (19) |
| O21—B6—O24                                                                                                                                                                                                                                                                                                                                                                                                                                           | 122 (3)    | O15—B12—O16                               | 112 (2)    |
| O22—B6—O24                                                                                                                                                                                                                                                                                                                                                                                                                                           | 121 (3)    | O10 <sup>xiii</sup> —B12—O16              | 105.9 (19) |
| O9—B7—O10                                                                                                                                                                                                                                                                                                                                                                                                                                            | 113 (2)    | O15—B12—O17                               | 109.4 (19) |
| O9—B7—O11                                                                                                                                                                                                                                                                                                                                                                                                                                            | 115 (2)    | O10 <sup>xiii</sup> —B12—O17              | 109.4 (19) |
| O10—B7—O11                                                                                                                                                                                                                                                                                                                                                                                                                                           | 104.6 (19) | O16—B12—O17                               | 106.8 (18) |
| O9—B7—O12                                                                                                                                                                                                                                                                                                                                                                                                                                            | 113 (2)    | O22—B13—O26                               | 115 (2)    |
| O10—B7—O12                                                                                                                                                                                                                                                                                                                                                                                                                                           | 106 (2)    | O22—B13—O25                               | 113 (2)    |
| O11—B7—O12                                                                                                                                                                                                                                                                                                                                                                                                                                           | 105.2 (19) | O26—B13—O25                               | 107.8 (19) |
| O13—B8—O7                                                                                                                                                                                                                                                                                                                                                                                                                                            | 113 (2)    | O22—B13—O23                               | 108.2 (19) |
| O13—B8—O12                                                                                                                                                                                                                                                                                                                                                                                                                                           | 111.4 (19) | O26—B13—O23                               | 108.6 (18) |
| O7—B8—O12                                                                                                                                                                                                                                                                                                                                                                                                                                            | 110.7 (18) | O25—B13—O23                               | 104.3 (18) |
| O13—B8—O8                                                                                                                                                                                                                                                                                                                                                                                                                                            | 110.6 (18) | O16 <sup>xii</sup> —B14—O3 <sup>xiv</sup> | 110 (2)    |
| O7—B8—O8                                                                                                                                                                                                                                                                                                                                                                                                                                             | 108 (2)    | O16 <sup>xii</sup> —B14—O23               | 112.8 (19) |
| O12—B8—O8                                                                                                                                                                                                                                                                                                                                                                                                                                            | 103.4 (18) | O3 <sup>xiv</sup> —B14—O23                | 109.8 (19) |
| O4—B9—O26 <sup>ii</sup>                                                                                                                                                                                                                                                                                                                                                                                                                              | 110 (2)    | O16 <sup>xii</sup> —B14—O24               | 105.7 (19) |
| O4—B9—O8                                                                                                                                                                                                                                                                                                                                                                                                                                             | 107.7 (19) | O3 <sup>xiv</sup> —B14—O24                | 110.5 (19) |
| O26 <sup>ii</sup> —B9—O8                                                                                                                                                                                                                                                                                                                                                                                                                             | 110 (2)    | O23—B14—O24                               | 108 (2)    |
| Symmetry codes: (i) $-x+1, y+1/2, -z+1$ ; (ii) $-x, y-1/2, -z+1$ ; (iii) $x, y-1, z-1$ ; (iv) $-x, y+1/2, -z$ ; (v) $-x+1, y-1/2, -z+1$ ; (vi) $-x+1, y+1/2, -z$ ; (vii) $-x+1, y-1/2, -z$ ; (viii) $x+1, y, z$ ; (ix) $-x, y-1/2, -z$ ; (x) $x-1, y, z$ ; (xi) $x+1, y+1, z$ ; (xii) $-x, y+1/2, -z+1$ ; (xiii) $x, y+1, z$ ; (xiv) $-x, y+3/2, -z+1$ ; (xv) $x, y+1, z+1$ ; (xvi) $x-1, y-1, z$ ; (xvii) $-x, y-3/2, -z+1$ ; (xviii) $x, y-1, z$ . |            |                                           |            |

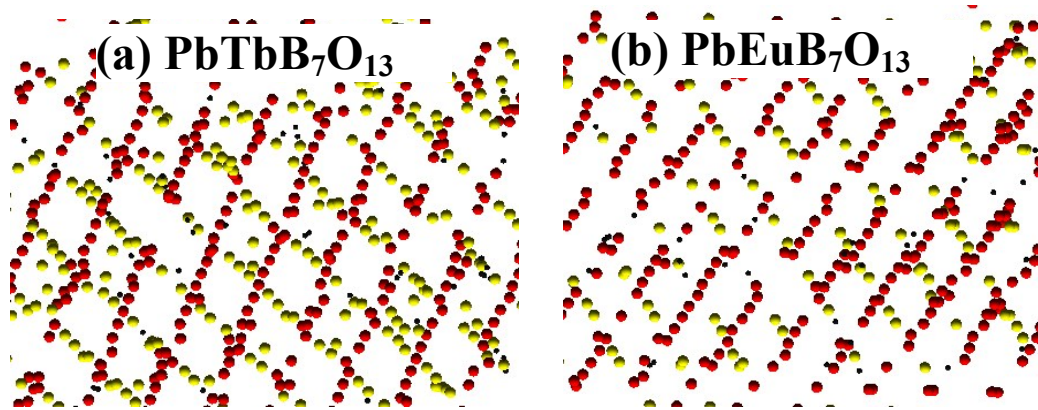

Figure S1. Reciprocal lattice of  $\text{PbTbB}_7\text{O}_{13}$  (a) and  $\text{PbEuB}_7\text{O}_{13}$  (b) constructed by experimental data.

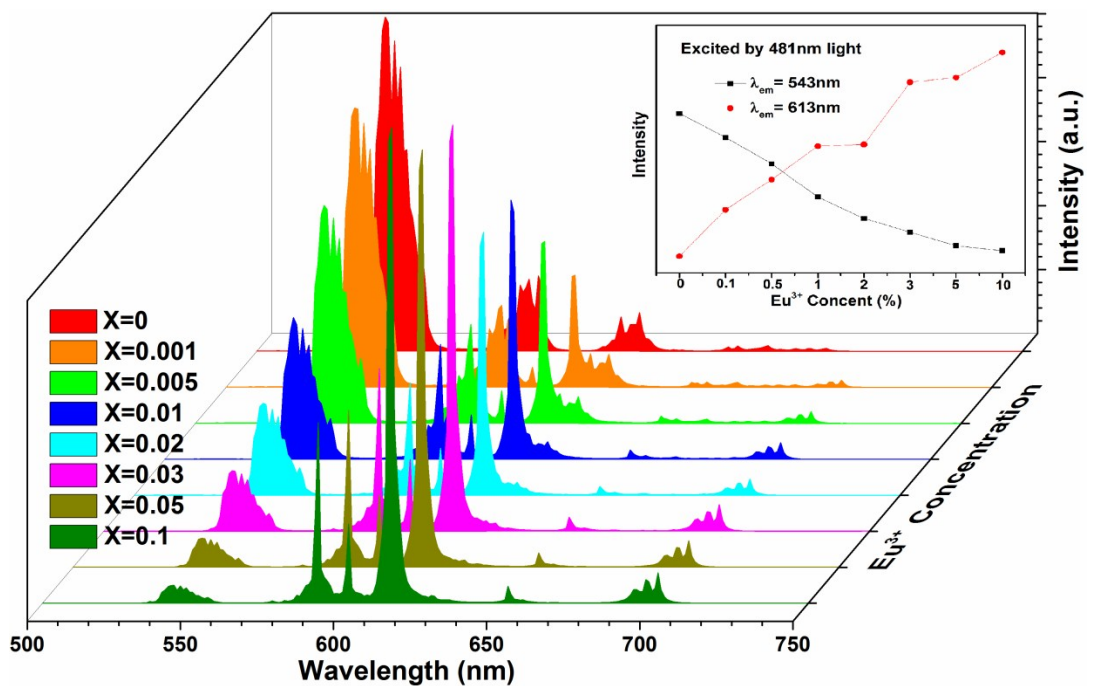

Figure S2. PL spectra of representative  $\text{PbTb}_{1-x}\text{Eu}_x\text{B}_7\text{O}_{13}$  ( $x=0\sim 0.1$ ) phosphors excited by 481 nm ( ${}^7\text{F}_6 \rightarrow {}^5\text{D}_4$  of  $\text{Tb}^{3+}$ ) as a function of  $\text{Eu}^{3+}$  doping content  $x$ . Inset is the variation of 543 nm ( ${}^5\text{D}_4 \rightarrow {}^7\text{F}_5$  of  $\text{Tb}^{3+}$ ) and 613 nm ( ${}^7\text{F}_0 \rightarrow {}^5\text{D}_2$  of  $\text{Eu}^{3+}$ ) emission intensity.

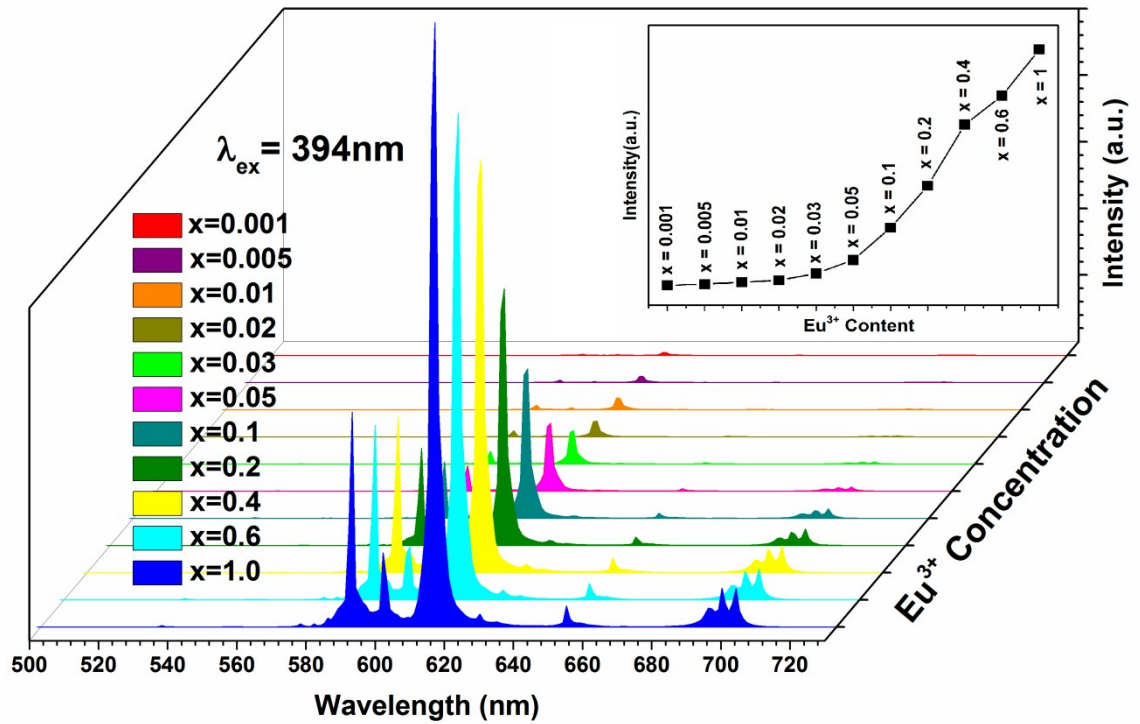

Figure S3. PL spectra of representative  $\text{PbTb}_{1-x}\text{Eu}_x\text{B}_7\text{O}_{13}$  ( $x=0.001\sim 1$ ) phosphors excited by 394 nm ( ${}^7\text{F}_0\rightarrow{}^5\text{L}_6$  of  $\text{Eu}^{3+}$ ) as a function of  $\text{Eu}^{3+}$  doping content  $x$ . Inset is the variation of 613 nm ( ${}^7\text{D}_0\rightarrow{}^7\text{F}_2$  of  $\text{Eu}^{3+}$ ) emission intensity.
